# Supplementary material for: Unveiling the efficiency of microwave-assisted hydrothermal treatment for the preparation of SrTiO3 mesocrystals
Source: Royal Society of Chemistry journal article supplement (doi:10.1039/c9cp02893e), 2019-01-01
Supplement: c9cp02893e1.pdf [file c9cp02893e1.pdf]

## ELECTRONIC SUPPLEMENTARY INFORMATION

### Unveiling the Efficiency of Microwave-Assisted Hydrothermal Treatment for the Preparation of SrTiO<sub>3</sub> Mesocrystals

Luís F. da Silva,\* Ariadne C. Catto, Waldir Avansi Jr, Alexandre Mesquita, Lauro J. Q. Maia, Osmando F. Lopes, Mário L. Moreira, Máximo Siu Li, Mário L. Moreira, Elson Longo, Juan Andrés and Valmor R. Mastelaro

\*E-mail: [lfsilva83@gmail.com](mailto:lfsilva83@gmail.com)

#### Experimental Results

X-ray diffraction of samples SAM2, SAM3 and SAM4 obtained via MAH route are shown in Fig.S1. All the diffraction peaks were indexed to a cubic structure of SrTiO<sub>3</sub> phase in accordance with JCPDS file 35-0734.

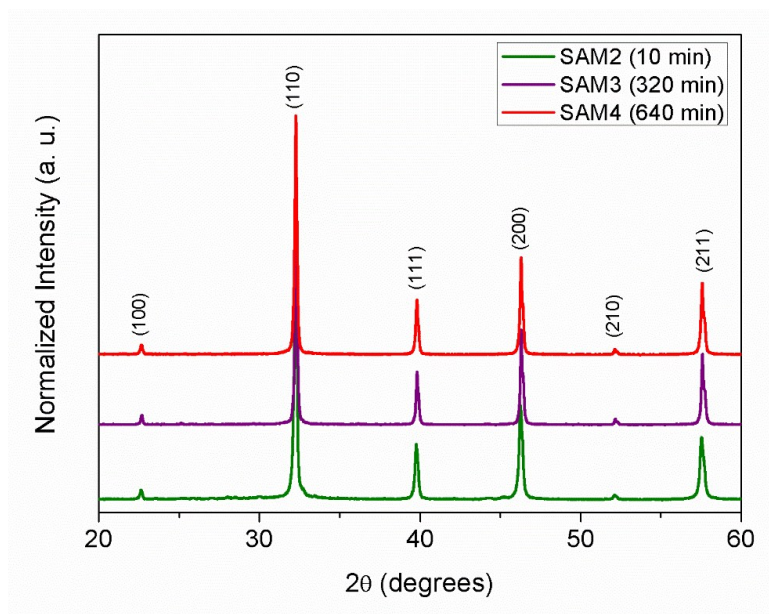

**Fig. S1.** XRD patterns of samples treated at 140 °C at different treatment times in the MAH system.

The structure was refined using the Rietveld method and the General Structure Analysis System (GSAS) package with the EXPGUI graphical user interface.<sup>1</sup> The data were collected in the  $2\theta = 10\text{-}100^\circ$  range with a  $1^\circ$  divergence slit, 0.3 mm receiving slit,  $0.02^\circ$  step width, and  $5\text{ s point}^{-1}$  using a Rigaku diffractometer (model RU200B) with a  $\text{CuK}\alpha$  radiation source. The XRD patterns

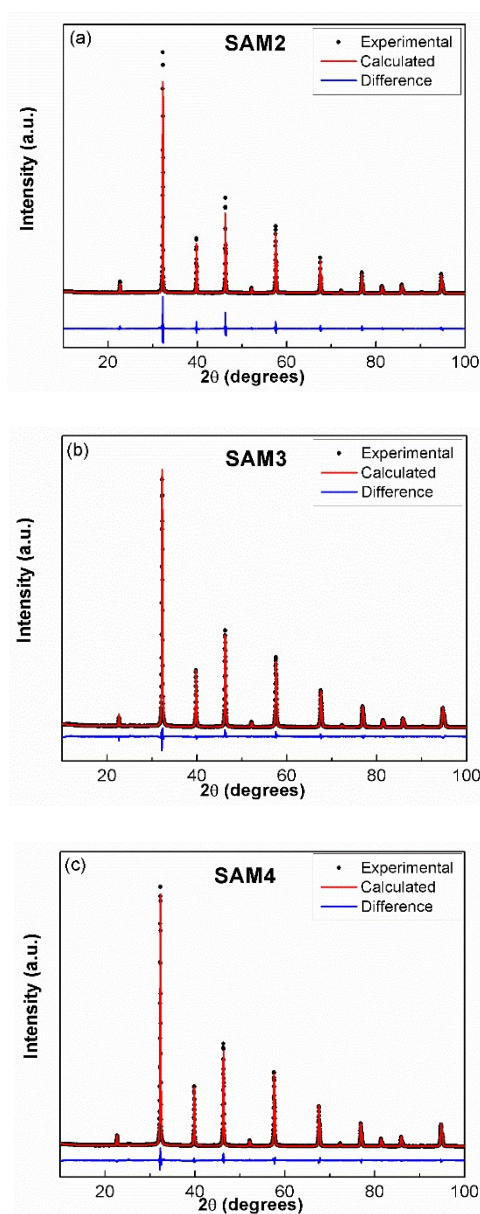

**Fig. S2.** Rietveld graphics for SAM2, SAM3 and, SAM4 samples. The corresponding refinement results are presented in Table 1 of the manuscript.

Figure S3 shows the FTIR spectra of SAM2, SAM3 and SAM4 samples. The spectra were recorded on a Bruker (Equinox 55) infrared spectrometer in reflectance mode from 400 to 4000  $\text{cm}^{-1}$  at a resolution of 4  $\text{cm}^{-1}$  and a signal average of 32 scans. The samples were mixed with KBr using a 1:10 ratio. It can be observed that the low-frequency band centered at 590  $\text{cm}^{-1}$  is typical of metal-oxygen stretching in titanate compounds.<sup>2,3</sup> In addition, the bands at 1770, 1464, and 1110  $\text{cm}^{-1}$  are associated with carbon groups adsorbed onto samples surface.<sup>3,4</sup> The 3420 and 1650  $\text{cm}^{-1}$  centered bands can be attributed to the stretching vibration of the O-H bond from the water adsorbed on the particle surface during hydrothermal treatment.<sup>5,6</sup> According to the literature, the presence of OH groups on the nanoparticle surface is the driving force for the process of coalescence or aggregation of the particles giving rise to the formation of the cubes.<sup>5-7</sup> Thus, the existence of these bonds is in good agreement with the proposed model on the morphological evolution of the STO phase cubes.

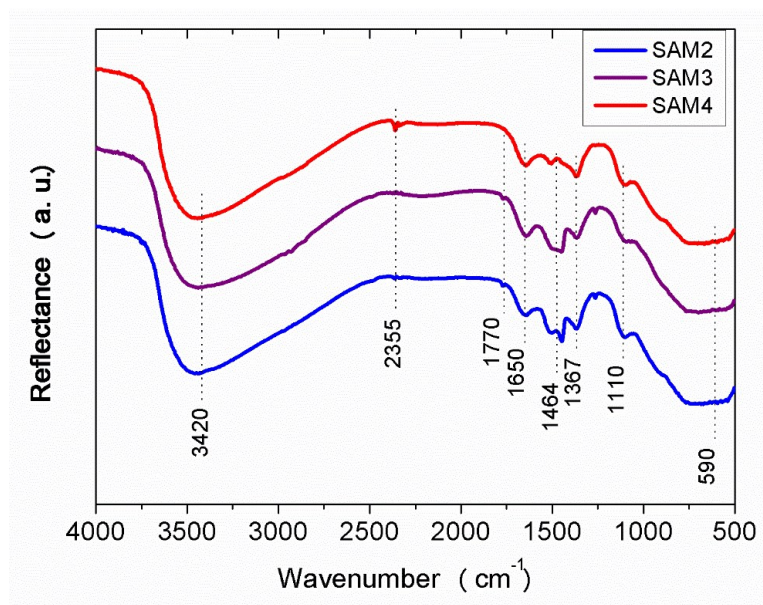

**Fig. S3.** FTIR spectra of the SAM2, SAM3 and SAM4 samples.

## References

- 1 B. H. Toby, EXPGUI, a graphical user interface for GSAS, *J. Appl. Crystallogr.*, 2001, **34**, 210–213.
- 2 M. Kakihana, T. Okubo, M. Arima, Y. Nakamura, M. Yashima and M. Yoshimura, Polymerized Complex Route to the Synthesis of Pure SrTiO<sub>3</sub> at Reduced Temperatures: Implication for Formation of Sr-Ti Heterometallic Citric Acid Complex, *J. Sol-Gel Sci. Technol.*, 1998, **12**, 95–109.
- 3 L. F. da Silva, O. F. Lopes, V. R. de Mendonça, K. T. G. Carvalho, E. Longo, C.

- Ribeiro and V. R. Mastelaro, An Understanding of the Photocatalytic Properties and Pollutant Degradation Mechanism of SrTiO<sub>3</sub> Nanoparticles, *Photochem. Photobiol.*, 2016, **92**, 371–378.
- 4 M. L. Moreira, V. M. Longo, W. Avansi, M. M. Ferrer, J. Andrés, V. R. Mastelaro, J. A. Varela and É. Longo, Quantum Mechanics Insight into the Microwave Nucleation of SrTiO<sub>3</sub> Nanospheres, *J. Phys. Chem. C*, 2012, **116**, 24792–24808.
  - 5 W. Dong, B. Li, Y. Li, X. Wang, L. An, C. Li, B. Chen, G. Wang and Z. Shi, General Approach to Well-Defined Perovskite MTiO<sub>3</sub> (M = Ba, Sr, Ca, and Mg) Nanostructures, *J. Phys. Chem. C*, 2011, **115**, 3918–3925.
  - 6 J. Yin, H. Cao, J. Zhang, M. Qu and Z. Zhou, Synthesis and Applications of  $\gamma$ -Tungsten Oxide Hierarchical Nanostructures, *Cryst. Growth Des.*, 2013, **13**, 759–769.
  - 7 F. Dang, K. Mimura, K. Kato, H. Imai, S. Wada, H. Haneda and M. Kuwabara, Growth of monodispersed SrTiO<sub>3</sub> nanocubes by thermohydrolysis method, *CrystEngComm*, 2011, **13**, 3878–3883.
